# Supplementary material for: Crystal structures and magnetic properties of (4,4′-phenylazophenyl)diammonium(crown ethers)[Ni(dmit)2]2 crystals
Source: Royal Society of Chemistry journal article supplement (doi:10.1039/c2dt30807j), 2012-01-01
Supplement: c2dt30807j.pdf [file c2dt30807j.pdf]

## Supporting Information

# Crystal Structures and Magnetic Properties of (4,4'-Phenylazophenyl)-diammonium(Crown ethers)[Ni(dmit)<sub>2</sub>]<sub>2</sub> Crystals

Norihisa Hoshino, Kazuya Kubo, Shin-ichiro Noro, Takayoshi Nakamura, and Tomoyuki Akutagawa

Full list of all authors in Ref. 9

Frisch, M. J.; Trucks, G. W.; Schlegel, H. B.; Scuseria, G. E.; Robb, M. A.; Cheeseman, J. R.; Zakrzewski, V. G.; Montgomery, J. A., Jr.; Stratmann, R. E.; Burant, J. C.; Dapprich, S.; Millam, J. M.; Daniels, A. D.; Kudin, K. N.; Strain, M. C.; Farkas, O.; Tomasi, J.; Barone, V.; Cossi, M.; Cammi, R.; Mennucci, B.; Pomelli, C.; Adamo, C.; Clifford, S.; Ochterski, J.; Petersson, G. A.; Ayala, P. Y.; Cui, Q.; Morokuma, K.; Malick, D. K.; Rabuck, A. D.; Raghavachari, K.; Foresman, J. B.; Cioslowski, J.; Ortiz, J. V.; Baboul, A. G.; Stefanov, B. B.; Liu, G.; Liashenko, A.; Piskorz, P.; Komaromi, I.; Gomperts, R.; Martin, R. L.; Fox, D. J.; Keith, T.; Al-Laham, M. A.; Peng, C. Y.; Nanayakkara, A.; Gonzalez, C.; Challacombe, M.; Gill, P. M. W.; Johnson, B.; Chen, W.; Wong, M. W.; Andres, J. L.; Gonzalez, C.; Head-Gordon, M.; Replogle, E. S.; Pople, J. A. *GAUSSIAN 98*; Gaussian, Inc.: Pittsburgh, PA, 1998.

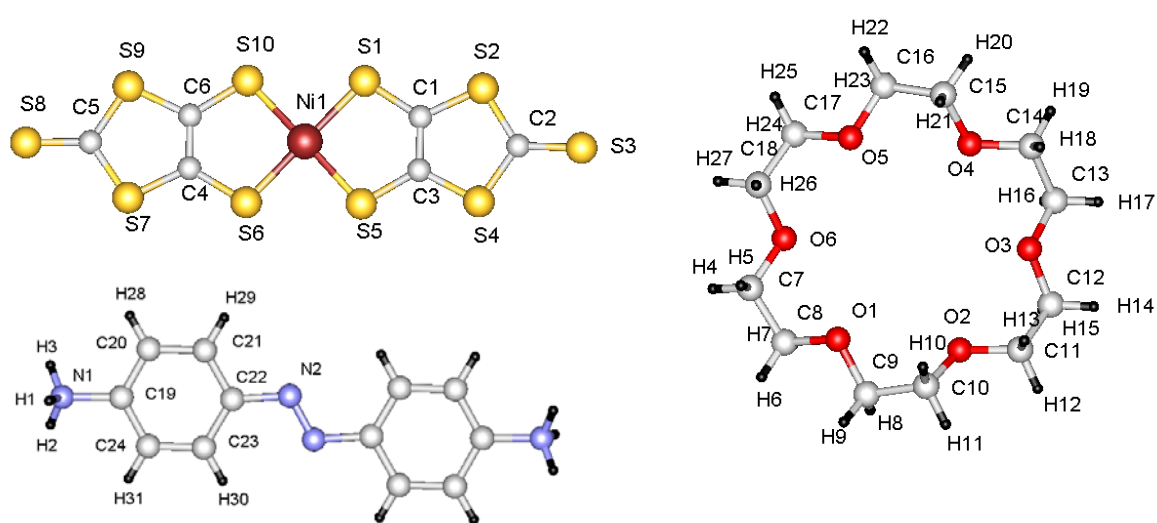

**Figure S1.** Atomic numbering scheme of crystal **1** at 100 K.

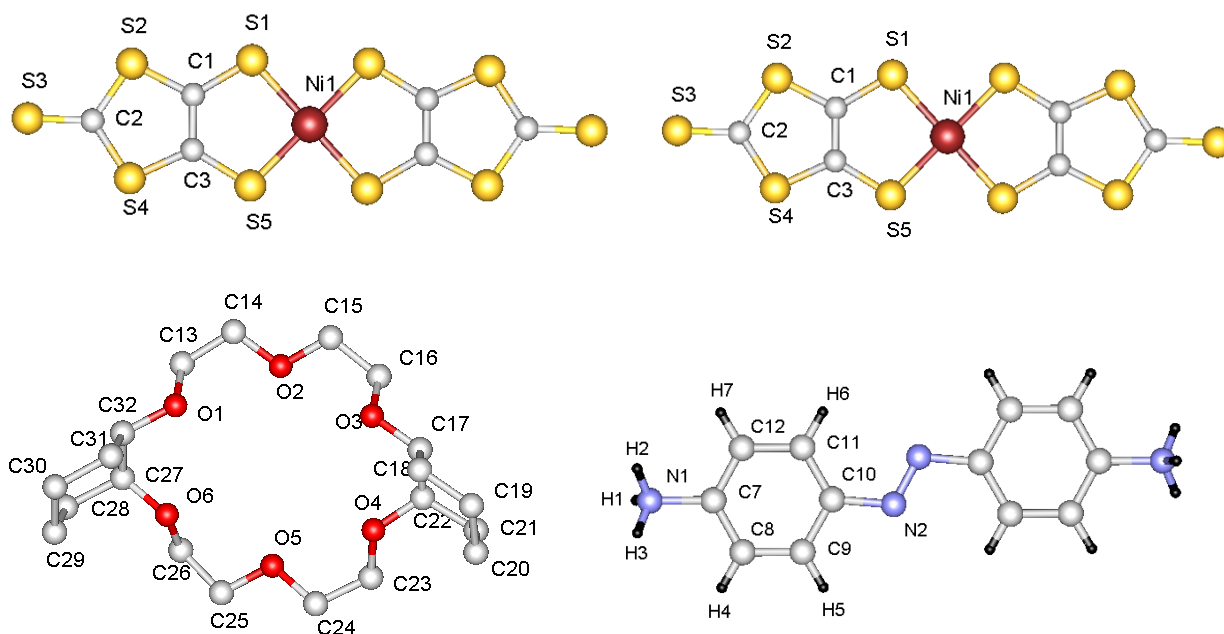

**Figure S2.** Atomic numbering scheme of crystal 2 at 100 K. The hydrogen atoms of DCH[18]crown-6 were omitted in figure.

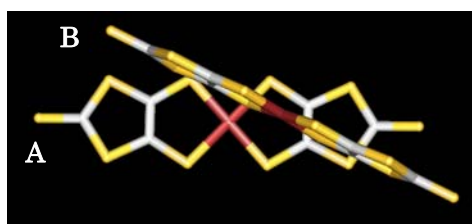

**Figure S3.** Orthogonal  $S \sim \pi$  [Ni(dmit)2] arrangement of **A** and **B** in crystal 2.
